# Supplementary material for: Comparative analysis of genomic- and EST-SSRs in European plum (Prunus domestica L.): implications for the diversity analysis of polyploids
Source: PubMed Central journal article supplement (PMC7679426; doi:10.1007/s13205-020-02513-w), 2020-11-21
Supplement: 13205_2020_2513_MOESM2_ESM.pdf [file 13205_2020_2513_MOESM2_ESM.pdf]

**Supplementary Table 1:** main features of the plum varieties under investigation.

| Variety                  | Skin Color <sup>1</sup> | Flesh Color <sup>2</sup> | Fruit Shape <sup>3</sup> |
|--------------------------|-------------------------|--------------------------|--------------------------|
| Biancolella di Ottaviano | Y                       | Y                        | ELLI                     |
| Botta a muro bianca      | Y                       | Y                        | CIRC                     |
| Cacazzara                | V                       | R                        | OBLA                     |
| Calavrice                | NA                      | NA                       | NA                       |
| Coglie 'e astag bianca   | Y                       | Y                        | CIRC                     |
| Coglie 'e astag nera     | R                       | R                        | CIRC                     |
| Core                     | R                       | O                        | ELLI                     |
| Del Carmine              | GY                      | Y                        | ELLI                     |
| Della Maddalena          | NA                      | NA                       | NA                       |
| Di Spagna                | GY                      | Y                        | CIRC                     |
| Fele                     | VB                      | Y                        | ELLI                     |
| Fiaschetta               | VB                      | G                        | OBOV                     |
| Fiocco bianco            | Y                       | Y                        | ELLI                     |
| Fiocco rosa              | OR                      | Y                        | ELLI                     |
| Genova giallo-verde      | GY                      | Y                        | ELLI                     |
| Lecina tonda             | Y                       | Y                        | CIRC                     |
| Marchigiana              | R                       | O                        | CIRC                     |
| 'Mbriaca                 | GY                      | GY                       | ELLI                     |
| Melella                  | R                       | O                        | OBLA                     |
| Nera tardiva             | NA                      | NA                       | NA                       |
| Occhio di bue            | GY                      | Y                        | CIRC                     |
| Pannaranese              | GY                      | Y                        | ELLI                     |
| Pappacona                | Y                       | GY                       | ELLI                     |
| Pappacona gialla         | Y                       | Y                        | ELLI                     |
| Pappacona rossa          | VB                      | GY                       | ELLI                     |
| Pappacona verde          | GY                      | GY                       | ELLI                     |
| Pazza di Somma           | Y                       | Y                        | OBOV                     |
| Pezza rossa              | VB                      | O                        | OBLA                     |
| Preta 'e zucchero        | R                       | O                        | CIRC                     |
| Prunarinia               | Y                       | Y                        | ELLI                     |
| Rachele                  | GY                      | G                        | ELLI                     |
| Riardo                   | VB                      | O                        | OBOV                     |
| San Giovanni             | Y                       | G                        | OBOV                     |
| San Rafele               | GY                      | GY                       | ELLI                     |
| Santa Maria              | R                       | O                        | CIRC                     |
| Santangiolo              | NA                      | NA                       | NA                       |
| Santa Paola              | R                       | O                        | CIRC                     |
| Scarrafona               | VB                      | G                        | ELLI                     |
| Scauratella              | Y                       | Y                        | CIRC                     |
| Sile                     | GY                      | Y                        | ELLI                     |
| Turcona                  | Y                       | Y                        | ELLI                     |
| Uttaiana                 | Y                       | Y                        | OBOV                     |
| Zi' Augusto              | GY                      | GY                       | CIRC                     |
| Zuccarina                | Y                       | Y                        | ELLI                     |

1 GY: green-yellowish; NA: not available; OR: orange yellow; R: red; V: violet (from light to dark); VB: violet blue; Y: yellow.

2 G: green; GY: green-yellowish; NA: not available; O: orange; R: red; Y: yellow.

3 Circ: Circular; Elli: Elliptic; Obla: Oblate; Oblo: Oblong; Obov: Obovate; NA: not available.

**Supplementary Table 2.** Primer sequences (in alphabetic order) and their annealing temperature (Ta).

References are provided in the main text.

| Locus     | Primer forward (5'-3')  | Primer reverse (5'-3')  | Ta (°C) |
|-----------|-------------------------|-------------------------|---------|
| BPPCT 004 | CTGAGTGATCCATTTGCAGG    | AGGGCATCTAGACCTCATTGTT  | 57      |
| BPPCT 014 | TTGTCTGCCTCTCATCTTAACC  | CATCGCAGAGAACTGAGAGC    | 57      |
| BPPCT 028 | TCAAGTTAGCTGAGGATCGC    | GAGCTTGCCTATGAGAAGACC   | 57      |
| EPPISF001 | TCCAAGTGGCTACGAGTGT     | AGGATGTGGAAGAAGGCAAG    | 57      |
| EPPISF004 | CTGAACCACACAAGCCACAT    | TGAGATGAGATGAGAGCAAGC   | 57      |
| EPPISF027 | TTACATGCCTTACGCTGCTG    | CACCCAGATGGTCCTGATCT    | 57      |
| ES4       | CCGTAATAACCACCGTCC      | CCGCCTTCATCATCCTCT      | 58.2    |
| ES5       | CCAGATCCACTATTTCTTC     | GTGTTAGAGCCAGAAACC      | 56      |
| PS12A02   | GCC ACC AAT GGT TCT TCC | AGCACCAGATGCACCTGA      | 55      |
| UDP98-409 | GCTGATGGGTTTTATGGTTTTTC | CGGACTCTTATCCTCTATCAACA | 57      |
